# Supplementary material for: A subgroup of pancreatic adenocarcinoma is sensitive to the 5-aza-dC DNA methyltransferase inhibitor
Source: PubMed Central journal article supplement (PMC4359252; doi:10.18632/oncotarget.2685), 2014-12-03
Supplement: oncotarget-06-746-s001.pdf [file oncotarget-06-746-s001.pdf]

## SUPPLEMENTARY TABLES

**Supplementary Table S1. Genes underexpressed in sensitive compared to resistant tumors to 5-aza-dC**

**Supplementary Table S2. Genes overexpressed in sensitive compared to resistant tumors to 5-aza-dC**
